# Supplementary material for: Discovery of a novel accessory protein NS7a encoded by porcine deltacoronavirus
Source: PubMed Central journal article supplement (PMC7079566; doi:10.1099/jgv.0.000690), 2017-03-13
Supplement: jgv-98-173-s001.pdf [file jgv-98-173-s001.pdf]

**Figure S1**

| Accession             | Sequence                                                                                               | Identity (%) |
|-----------------------|--------------------------------------------------------------------------------------------------------|--------------|
| CHN-HN-2014           | MAQLKVSELTPTSTLEEDLRSVEVAQDLNLLTPEAQAISPGNATNLHPLRYVVRPNIKLPSGLYLRVKPFLRYLATGLVLVPMSALQTLRRRVWLI LASWL | 100          |
| 8734/USA-IA/2014      | -----q-----s-r-----p-----                                                                              | 100          |
| CH/Sichuan/S27/2012   | -----q-----s-----p-----                                                                                | 100          |
| CH/SXD1/2015          | --p-----p-----fa-----                                                                                  | 100          |
| CHJXNI2/2015          | -----v-----q-----s-----p-----a-----                                                                    | 100          |
| CHN-AH-2004           | -----l-----p-----v-----                                                                                | 100          |
| CHN-HB-2014           | --p-----p-----                                                                                         | 100          |
| CHN-JS-2014           | -----q-----k-s-----p-----a-----                                                                        | 100          |
| HKU15-44              | --p-----p-----                                                                                         | 100          |
| HKU15-155             | --p-----p-----                                                                                         | 100          |
| S5011/2015            | -v-----l-----k-----l-----p-----a-----                                                                  | 100          |
| 0115/PDCoV/2016/Lao   | -v-----h-----l-----k-----l-----p-----a-a-----                                                          | 100          |
| S5015L/2015           | -v-----l-----k-----l-----p-----a-----                                                                  | 100          |
| TT 1115               | -v-----h-----l-----k-----l-----p-----a-a-----                                                          | 100          |
| IL2768                | -----q-----s-----p-----                                                                                | 100          |
| Illinois121/2014      | -----q-----s-----p-----                                                                                | 100          |
| Indiana453/2014       | -----q-----s-----p-----                                                                                | 100          |
| Iowa136/2015          | -----q-----s-----p-----                                                                                | 100          |
| KNU14-04              | -----q-----s-----p-----a-----                                                                          | 100          |
| KY4813                | -----q-----s-----p-----                                                                                | 100          |
| MI6148                | -----q-----s-----p-----                                                                                | 100          |
| Michigan448/2014      | -----q-----s-----p-----                                                                                | 100          |
| NE3579                | -----q-----s-----p-----                                                                                | 100          |
| NH                    | -----p-----a-----                                                                                      | 100          |
| NorthCarolina452/2014 | -----q-----s-----p-----                                                                                | 100          |
| OH1987                | -----q-----s-----p-----                                                                                | 100          |
| OH11846               | -----q-----s-----p-----                                                                                | 100          |
| OhioCVM1/2014         | --p-----p-----                                                                                         | 100          |
| PA3148                | -----q-----s-----p-----                                                                                | 100          |
| IL/2014/026PDV_P11    | -----q-----s-----p-----                                                                                | 100          |
| SD3424                | -----q-----s-----p-----                                                                                | 100          |

**Fig.S1. Comparison of amino acid sequences of NS7a protein of different PDCoV strains.** The number on the right represents the total amino acid amount of NS7a. Various PDCoV strains are listed on the left of picture, whose genbank accession numbers are as follows: Illinois121 2014 (KJ481931); HKU15-44 (NC-016990); HKU15-155 (JQ065043); CHJXNI2/2015 (KR131621); TT 1115 (KU984334); S5011/2015 (KU051641); S5015L/2015 (KU051649); IL2768 (KJ584355); KY4813 (KJ584357); MI6148 (KJ620016); NE3579 (KJ584359); OH1987 (KJ462462); OH11846 (KT381613); PA3148 (KJ584358); SD3424 (KJ584356); 8734/USA-IA/2014 (KJ769231); CHN-AH-2004 (KP757890); CHN-HB-2014 (KP757891); CHN-HN-2014 (KT336560); CHN-JS-2014 (KP757892); 0115/PDCoV/2016/Lao (KX118627); KNU14-04 (KM820765); CH/Sichuan/S27/2012 (KT266822); CH/SXD1/2015 (KT021234); NH (KU981059); Iowa136/2015 (KX022602); Indiana453/2014 (KR265851); Michigan448/2014 (KR265850); NorthCarolina452/2014 (KR265858); OhioCVM1/2014 (KJ769231); IL/2014/026PDV\_P11 (KP981395).
